# Supplementary material
Source: PubMed Central journal article supplement (PMC154332)
Supplement: pnas_0635848100_1.pdf [file pnas_0635848100_1.pdf]

**Table 1. List of Data Bank of Japan accession number and DNA sources**

| Species                        | AMELX    | AMELY    | Sources           |
|--------------------------------|----------|----------|-------------------|
| <i>Homo sapiens</i>            | AC002366 | AC013412 | Horai*            |
| <i>Pan troglodytes</i>         | AB091781 | AB091782 | Ueda†             |
| <i>Saimiri sciureus</i>        | AB091783 | AB091784 | Takenaka‡         |
| <i>Lemur catta</i>             | AB091785 | AB091786 | Klein§            |
| <i>Otolemur crassicaudatus</i> | AB091787 | AB091788 | Takenaka‡         |
| <i>Bos taurus</i>              | AB091789 | AB091790 | Funakoshi , Tokyo |
| <i>Sus scrofa</i>              | AB091791 | AB091792 | Funakoshi         |
| <i>Equus caballus</i>          | AB091793 | AB091794 | Hasegawa#         |

\* Dr. Satoshi Horai, Department of Biosystems Science, Sokendai, Hayama, Japan.

† Dr. Sintaroh Ueda, Department of Biological Sciences, Tokyo University, Tokyo.

‡ Dr. Osamu Takenaka, Primate Research Institute, Kyoto University, Inuyama, Japan.

§ Dr. Jan Klein, Department of Immunogenetics, Max Planck Institute for Biology, Tübingen, Germany

# Dr. Telhisa Hasegawa, Laboratory of Molecular and Cellular Biology, Equine Research Institute, Japan Racing Association, Utsunomiya, Japan.
